# Supplementary material for: Roles for Ndel1 in keratin organization and desmosome function
Source: PubMed Central journal article supplement — Mol Biol Cell. 2021 Oct 1;32(20):ar2. doi: 10.1091/mbc.E21-02-0087 (PMC8684757; doi:10.1091/mbc.e21-02-0087), 2021-10-01
Supplement: mbc-32-ar2-s001.pdf [file mbc-32-ar2-s001.pdf]

# Supplemental Materials

*Molecular Biology of the Cell*

Kim *et al.*

## Supplemental Figure 1

### IF consensus motif alignment

|             |                             |
|-------------|-----------------------------|
| TYRSLLEGEES | K10, H. sapiens             |
| TYRTLLEGEES | K1, H. sapiens              |
| TYRKLLEGEES | K5, H. sapiens              |
| TYRRLLEGEDA | K14, H. sapiens             |
| TYRKLLEGEES | Vimentin, H. sapiens        |
| TYRKLLEGEES | Desmin, H. sapiens          |
| AYRKLLEGEES | Lamin C, H. sapiens         |
| AYRKLLEGEES | Lamin B, H. sapiens         |
| AYRKLLEGEES | Lamin A, H. sapiens         |
| AYRKLLEGEET | Neurofilament-L, H. sapiens |
| AYRKLLEGEES | Neurofilament-H, H. sapiens |
| AYRKLLEGEET | Neurofilament-M, H. sapiens |
| TYRKLLEGEEN | GFAP, H. sapiens            |
| TYRTLLEAENS | Nestin, H. sapiens          |
| AYRKLLEGEET | Interneixin, H. sapiens     |
| AYDKLLVGEEA | Lamin D, D. melanogaster    |
| AYDKLLVGEEA | Lamin C, D. melanogaster    |
| AYDKLLVGEEA | Lamin B, D. melanogaster    |
| AYDKLLVGEEA | Lamin A, D. melanogaster    |
| RYRVLLNGANV | Ifc-1, C. elegans           |
| RYRILLNGANV | Ifc-2, C. elegans           |
| KYRELLDRSGD | Ifp-1, C. elegans           |

**Supplemental Figure 1.** Alignment of intermediate filament (IF) consensus motifs of diverse IF proteins.

Supplemental Figure 2

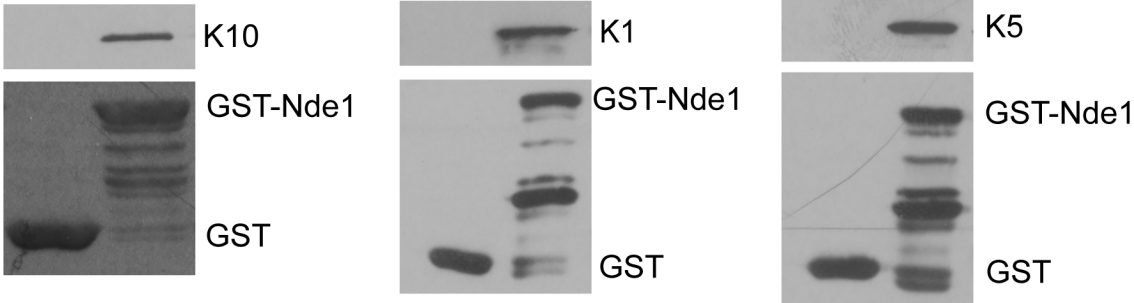

**Supplemental Figure 2.** Interaction of Keratins 10, 1, and 5 with Nde1. Purified K10, K1, or K5 was added to beads bound to either GST or GST-Nde1.

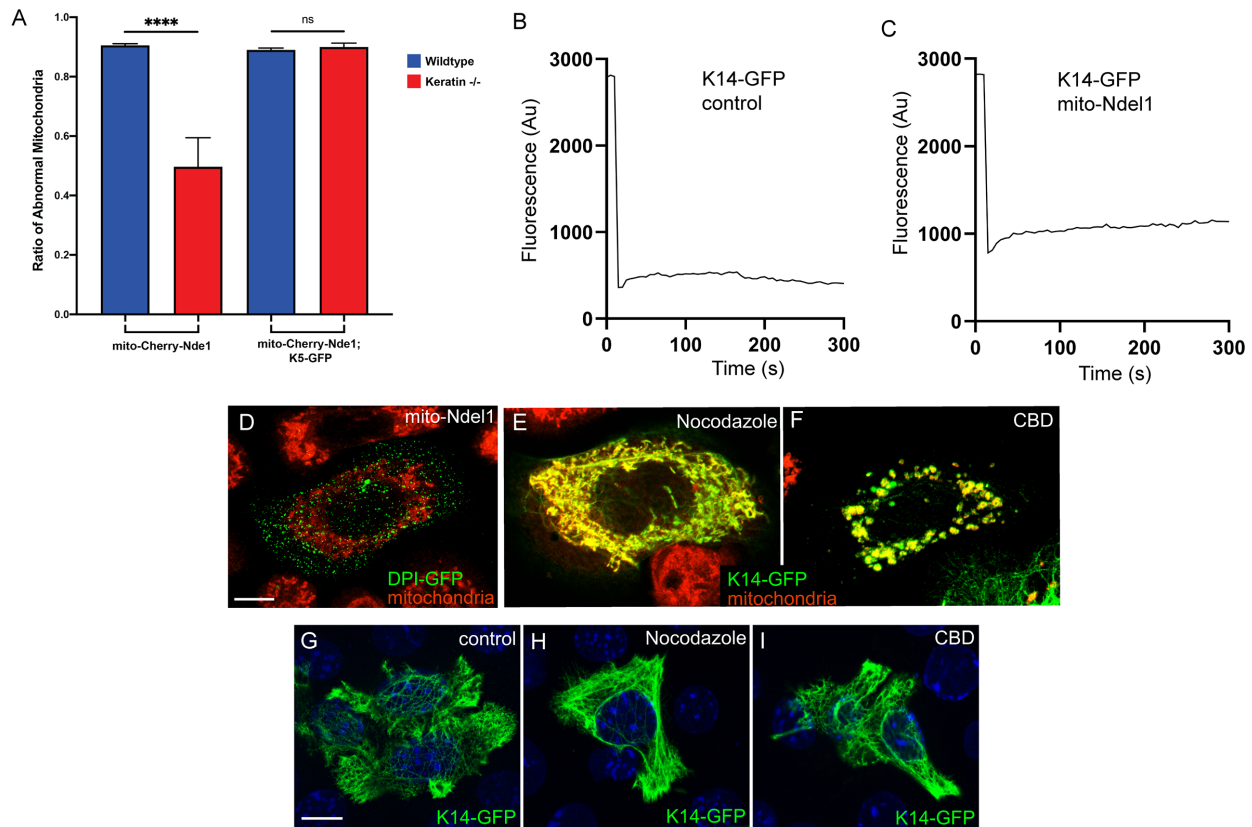

**Supplemental Figure 3.** Mitochondrial-targeting assay. (A) Quantitation of the frequency of abnormal mitochondrial morphology in keratinocytes. As indicated, either wild-type cells or keratin null cells were transfected with the mito-Cherry-Nde1 construct. Note that in keratin null cells, mitochondrial morphology defects are decreased. Re-expression of Krt5-GFP in these cells, which restores the keratin network, results in more penetrant defects in mitochondrial morphology in response to mito-Cherry-Nde1 expression.  $n=4$ ; ANOVA analysis was  $p<0.0001$ . Post Tukey's multiple comparisons were  $p<0.00001$  for wild type versus keratin null and  $p>0.9999$  for the rescue. Mito-Cherry-Nde1 and mito-Cherry-Nde1 gave similar results. Mito-Cherry-Nde1 was used because of slightly higher transfections efficiencies. (B,C) Representative traces of K14-GFP FRAP experiments in control and mito-Nde1 expressing cells. (D) WT keratinocytes were transfected with DPI-GFP (green) and mito-Nde1. Cells were treated with MitoTracker-Red to label mitochondria. We did not observe any co-localization of DP with the mitochondria. (E,F) WT keratinocytes were transfected with mito-Nde1 and keratin 14-GFP (green) and treated with either nocodazole (to disrupt microtubules), or ciliobrevin D (CBD, to inhibit dynein). Mitochondria were labeled with MitoTracker Red. (G-I) K14-GFP localization in control keratinocytes and in keratinocytes treated with either nocodazole or CBD. Note that drug treatment itself does not cause filament disruption. Scale bar is 10  $\mu\text{m}$ .

## Supplemental Figure 4

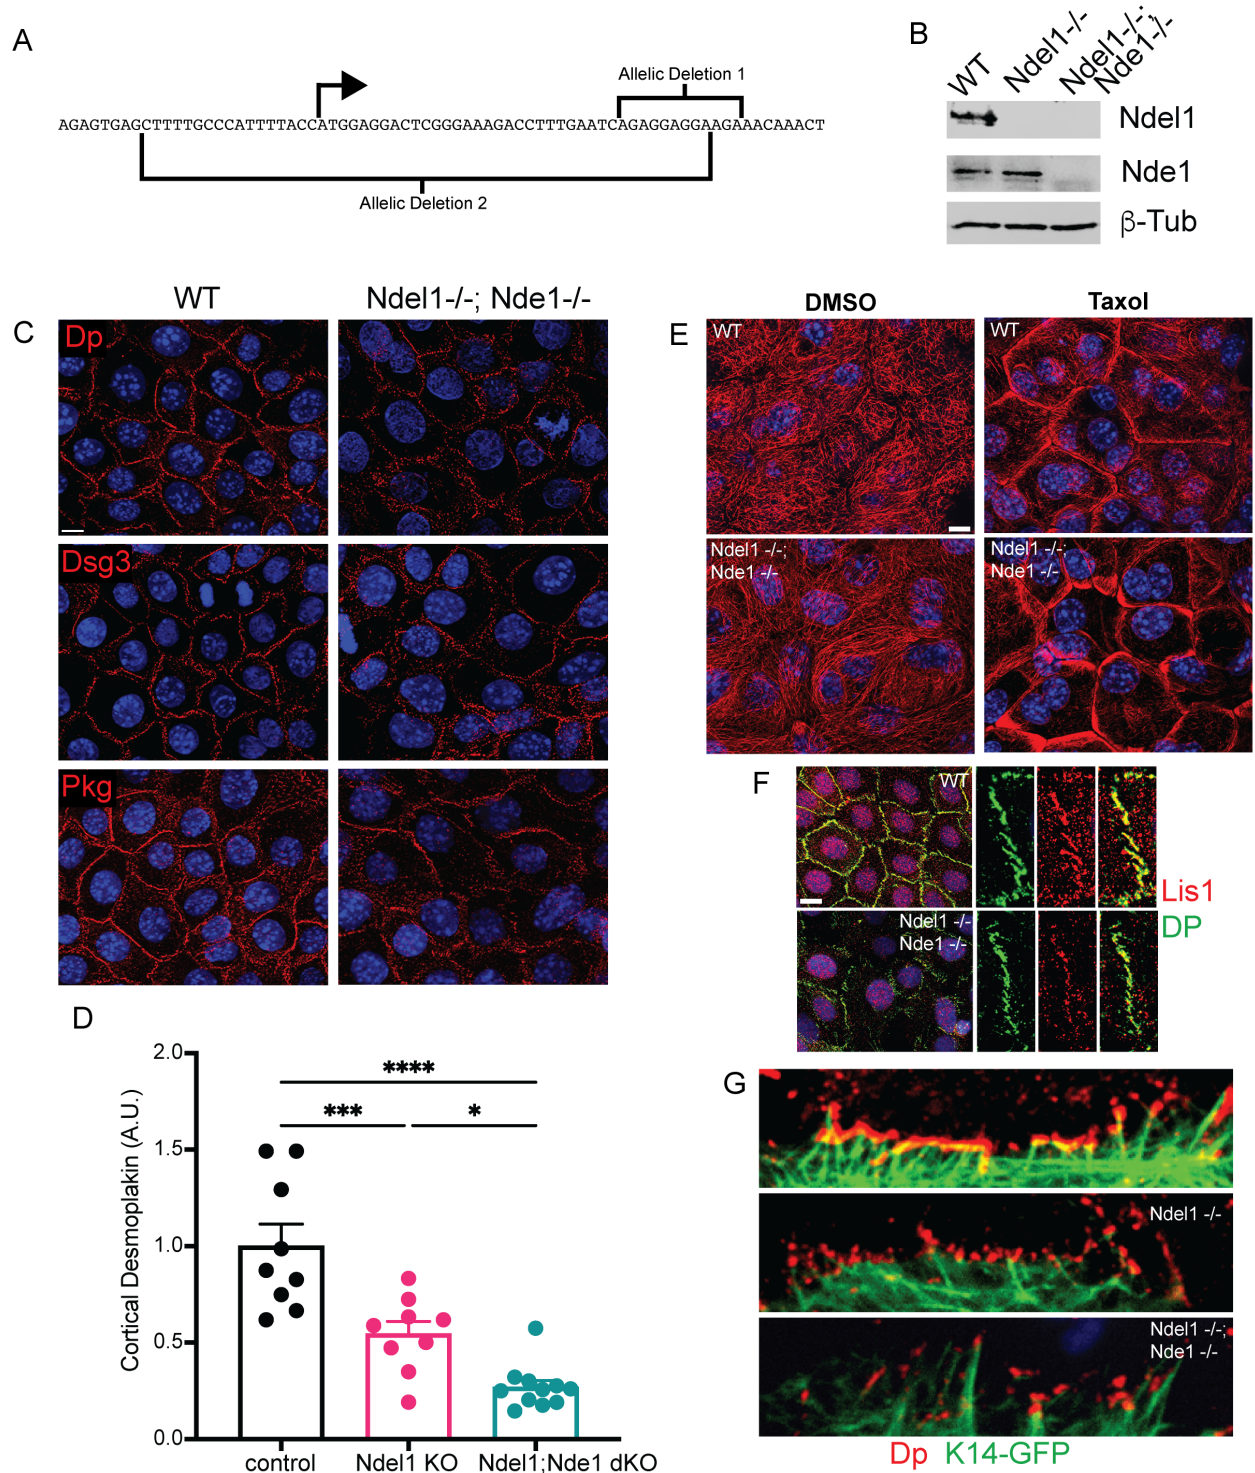

**Supplemental Figure 4.** Generation of Nde1;Nde1<sup>-/-</sup> cells. (A) Diagram of the region targeted by CRISPR and the two independent mutations generated in the clonal line used. (B) Western blot of lysates from control, Nde1 null and Nde1;Nde1 double null cell.  $\beta$ -tubulin is used as a

loading control. (C) Immunofluorescence of desmosomal proteins, as indicated, in control and Nde1;Nde1 double null cells. Scale bar is 10  $\mu$ m. (D) Quantitation of cortical DP levels in control, Nde1 KO and Nde1/Nde1 double knockout cells. n=3 experiments, with 3-4 images examined for each. ANOVA analysis, p-value<0.0001. Tukey's multiple comparisons test gave p-values of: p=0.0008 for control versus Nde1 KO, p<0.0001 for control versus the Nde1;Nde1 dKO, p=0.0323 for the Nde1 null versus the Nde1;Nde1 dKO. (E) Microtubule reorganization to the cell cortex is normal in Nde1<sup>-/-</sup>;Nde1<sup>-/-</sup> cells. Taxol was used to stabilize microtubules, which promotes their cortical organization in keratinocytes. (F) Localization of Lis1 (red) and DP (green) in control and Nde1/Nde1 double null keratinocytes. Note that while overall cortical levels of desmosomes are lower, Lis1 is still detected at the cortex in the mutant cells. (G) K14-GFP (green) organization at the desmosomes, marked by DP (red) in control, Nde1 null and Nde1/Nde1 double null keratinocytes.

Supplemental Figure 5

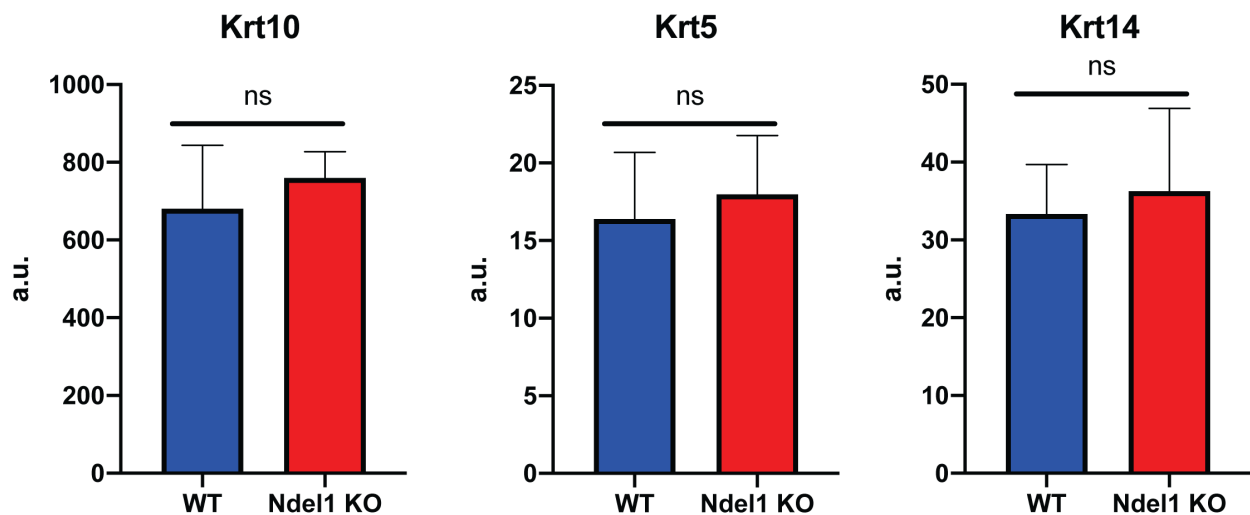

Supplemental Figure 5. Quantitation of keratin levels in whole cell lysates from WT and Nde1 KO epidermis.
